# Supplementary material for: Context-Dependent Encoding of Fear and Extinction Memories in a Large-Scale Network Model of the Basal Amygdala
Source: PubMed Central journal article supplement (PMC3060104; doi:10.1371/journal.pcbi.1001104), 2011-03-17
Supplement: pcbi.1001104.s004.pdf [file pcbi.1001104.s004.pdf]

**Table S1****Table S1A. Rate Model summary**

|                   |                                                                                              |
|-------------------|----------------------------------------------------------------------------------------------|
| Type              | Wilson Cowan                                                                                 |
| Transfer function | Sigmoid logistic function $S(x) = \frac{1}{1+e^{-p(x-\theta)}}$ , $p = 1.2$ , $\theta = 2.8$ |
| maximum rates     | $k_A = k_B = 0.97$                                                                           |
| refractoriness    | $r_A = r_B = 10^{-3}$                                                                        |
| learning rates    | $a_A = a_B = 0.15$                                                                           |

**Table S1B. SNN Model summary**

|                |                                                                                                                   |
|----------------|-------------------------------------------------------------------------------------------------------------------|
| Populations    | two: excitatory neurons (EXC), inhibitory neurons (INH)                                                           |
| Topology       | none                                                                                                              |
| Connectivity   | Random divergent connections prescribed by experimental findings                                                  |
| Neuron model   | Leaky-integrate-and-fire, fixed threshold, absolute refractory period (2ms)                                       |
| Channel models | -                                                                                                                 |
| Synapse models | Conductance-based difference of exponentials (AMPA, GABA <sub>A</sub> )                                           |
| Plasticity     | CS and contextual projections onto EXC neurons                                                                    |
| Input          | all neurons: conditioned stimulus (CS), background input (BKG),<br>EXC receive in addition contextual (CTX) input |
| Measurements   | Membrane potential, spike rates                                                                                   |

**Table S1C. Populations**

| Name | Elements   | Size |
|------|------------|------|
| EXC  | LIF neuron | 3400 |
| INH  | LIF neuron | 600  |

**Table S1D. Topology**

none

**Table S1E. Connectivity**

| <u>Projection</u> | Type                                                                              | <u>Connection probability</u> |
|-------------------|-----------------------------------------------------------------------------------|-------------------------------|
| EXC to EXC        | Divergent connections                                                             | 0.01                          |
| EXC to INH        | Divergent connections                                                             | 0.15 (0.5)                    |
| INH to EXC        | Divergent connections                                                             | 0.15 (0.5)                    |
| INH to INH        | Divergent connections                                                             | 0.1 (0.1-0.9)                 |
| <u>Weights</u>    |                                                                                   |                               |
| EXC to EXC,INH    | Static, drawn from normal distribution with $\mu = 1.25$ nS and $\sigma = 0.1$ nS | -                             |
| INH to EXC,INH    | Static, drawn from normal distribution with $\mu = 2.5$ nS and $\sigma = 0.1$ nS  | -                             |
| CS/CTX to EXC     | Plastic, drawn from normal distribution with 1 nS and $\sigma = 0.1$ nS           | -                             |
| CS to INH         | Static, drawn from normal distribution with 1 nS and $\sigma = 0.1$ nS            | -                             |
| <u>Delays</u>     |                                                                                   |                               |
| All connections   | Fixed, drawn from normal distribution with $\mu = 2$ ms and $\sigma = 0.1$ ms     | -                             |

**Table S1F. Neuron Model**

|                       |                                                                                                                                 |
|-----------------------|---------------------------------------------------------------------------------------------------------------------------------|
| Name                  | LIF neuron                                                                                                                      |
| Type                  | Leaky integrate-and-fire, conductance based synapses                                                                            |
| Subthreshold dynamics | $\tau_m \frac{dV}{dt} = (E_0 - V) + g_{ex}(E_{ex} - V) + g_{inh}(E_{inh} - V)$<br>If $V(t^-) < \theta \wedge V(t^+) > \theta$ , |
| Spiking               | 1. set $t^* = t$<br>2. emit spike with time-stamp $t^*$<br>3. reset $V(t) = E_K$<br>4. clamp $V(t)$ for 2 ms                    |

**Table S1G. Synapse Models**

|                        |                                                                                                     |
|------------------------|-----------------------------------------------------------------------------------------------------|
| AMPA/GABA <sub>A</sub> | $g(t) = g_{peak} \frac{e^{-t/\tau_1} - e^{-t/\tau_2}}{e^{-t_{peak}/\tau_1} - e^{-t_{peak}/\tau_2}}$ |
|------------------------|-----------------------------------------------------------------------------------------------------|

**Table S1H. Plasticity**

|             |                                                                                                                                                                                       |
|-------------|---------------------------------------------------------------------------------------------------------------------------------------------------------------------------------------|
| Description | Phenomenological rule of synaptic weight modification                                                                                                                                 |
| Update rule | $w_+ = w_- + \alpha_1 h m  w_{max} - w_-  c$ , if $h > 0$<br>$w_+ = w_- - \alpha_2 m  w_{min} - w_-  c$ , if $h = 0$                                                                  |
| Variables   | $\dot{c} = -\frac{c}{\tau_c} + A \delta(t_{pre})$<br>$\dot{h} = -\frac{h}{\tau_h} + B \delta(t_{pre})$                                                                                |
| Parameters  | m: (non-specific) neuromodulator<br>m=1: neuromodulator present<br>m=0: neuromodulator absent<br>learning rates $a_1 = a_2 = 16 * 10^{-4}$<br>( $w_{max} - w_-$ ): step-size increase |

**Table S1I. Input**

|                |                                                                                           |
|----------------|-------------------------------------------------------------------------------------------|
| Type           | Description                                                                               |
| CS to EXC/INH  | One Poisson generator per neuron in EXC and INH, phasic drive: 50ms, spiking rate: 500 Hz |
| CTX to EXC/INH | One Poisson generator per neuron in EXC, tonic drive, spiking rate: 300 Hz                |
| BKG to EXC     | Current injection: $DC = 330$ pA , $AC = 85$ pA                                           |
| BKG to INH     | Current injection: $DC = 220$ pA , $AC = 110$ pA                                          |

**Table S1J. Measurements**

|                                                                                   |
|-----------------------------------------------------------------------------------|
| Membrane potential V and spike times for randomly selected neurons in EXC and INH |
|-----------------------------------------------------------------------------------|
